# Supplementary material
Source: publisher figshare collection journal article supplement (https://acs.figshare.com/ndownloader/files/8447870)
Supplement: Supplementary file 1 [file 8447870]

## Supporting Information

### **Engineering of Heterojunction-Mediated Biointerface for Photoelectrochemical Aptasensing: Case of Direct Z-Scheme CdTe-Bi<sub>2</sub>S<sub>3</sub> Heterojunction with Improved Visible-Light-Driven Photo-electrical Conversion Efficiency**

Qian Liu<sup>a</sup>, Juan Huan<sup>b</sup>, Nan Hao<sup>b</sup>, Jing Qian<sup>b</sup>, Hanping Mao<sup>\*a</sup> and Kun Wang<sup>\*b</sup>

*<sup>a</sup>Key Laboratory of Modern Agriculture Equipment and Technology, School of Agricultural Equipment Engineering, Jiangsu University, Zhenjiang 212013, P.R. China*

*<sup>b</sup>School of Chemistry and Chemical Engineering, Jiangsu University, Zhenjiang 212013, P.R. China*

---

\*Corresponding author. Tel.: +86 511 88791800; fax: +86 511 88791708.

E-mail address: wangkun@ujs.edu.cn; maohp@ujs.edu.cn

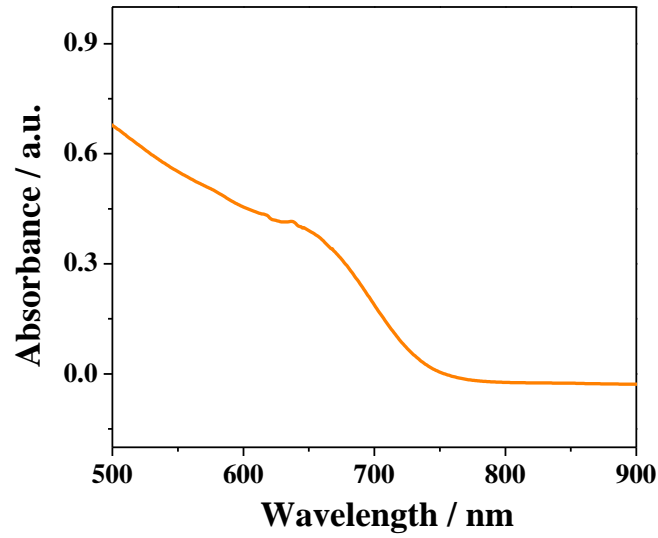

**Figure S1** UV-vis spectrum of CdTe QDs solution.

Figure S1 showed the UV-Vis absorption spectrum of CdTe QDs. It is obvious that a wide absorption band around 660 nm was observed. According to the empirical equations as follows:<sup>23</sup>

$$D = (9.8127 \times 10^{-7})\lambda^3 - (1.7147 \times 10^{-3})\lambda^2 + (1.0064)\lambda - 194.84$$

$$C = \frac{A}{10043(D)^{2.12}L}$$

where  $D$  (nm) and  $C$  (M) are the size and concentration of CdTe QDs, respectively.  $\lambda$  (nm) is the wavelength of the first excitonic absorption peak,  $A$  is the absorbance at the peak position of the first exciton absorption peak for CdTe QDs, and  $L$  (cm) is the path length of the radiation beam. The size and the concentration of the CdTe QDs solution were estimated to be 4.6 nm and 1.5  $\mu$ M by the empirical equations above.

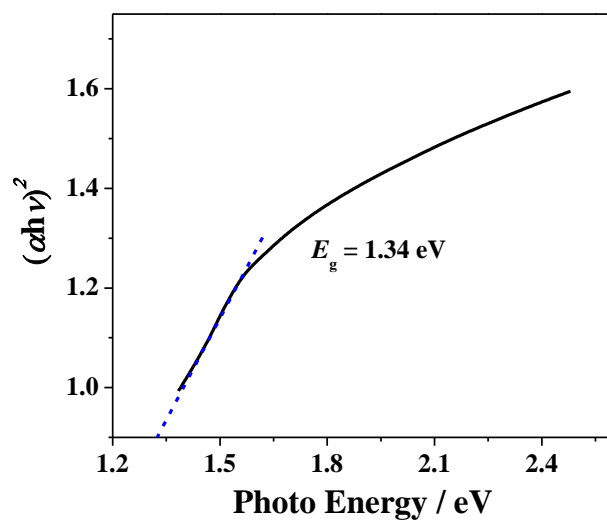

**Figure S2** Tauc's plots to determine the band gap for  $\text{Bi}_2\text{S}_3$  NRs.

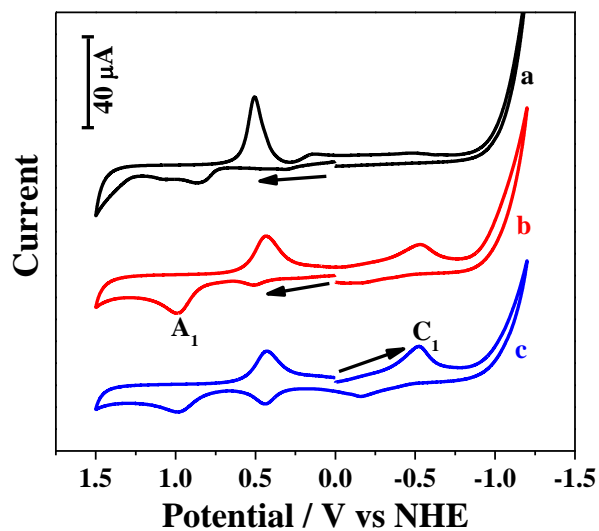

**Figure S3** Cyclic voltammograms of gold disc electrode recorded in borate buffer solution in the absence (a) and presence of CdTe QDs (b, c); (b) First sweep toward a direction of positive potential ( $0 \rightarrow +1.5$  V), (c) First sweep toward a direction of negative potential ( $0 \rightarrow -1.2$  V).

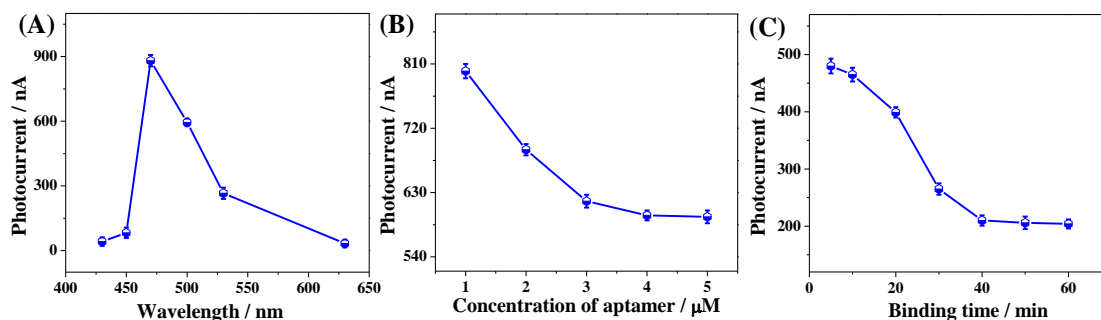

**Figure S4** Effects of (A) accessory light source with different wavelength (B) the aptamer concentration and (C) binding time of MC-LR with the aptamer on the photocurrent response of the aptasensor.

**Table S1** Zeta potential results of CdTe QDs, Bi<sub>2</sub>S<sub>3</sub> NRs and CdTe-Bi<sub>2</sub>S<sub>3</sub> heterojunction.

| Material            | CdTe QDs | Bi <sub>2</sub> S <sub>3</sub> NRs | CdTe-Bi <sub>2</sub> S <sub>3</sub> |
|---------------------|----------|------------------------------------|-------------------------------------|
| Zeta potential (mV) | −39.7    | +19.9                              | −35.5                               |

**Table S2** Analytical performance of different sensing methods for MC-LR.

| Methods                    | Linear Range | Detection limit | References |
|----------------------------|--------------|-----------------|------------|
| PEC aptasensor             | 0.1~1000 pM  | 0.03 pM         | 36         |
| Electrochemical aptasensor | 0.1~1000 pM  | 1.9 pM          | 38         |
| Colorimetric aptasensor    | 0.1~250 nM   | 0.05 nM         | 39         |
| Fluorescence aptasensor    | 0.01~50 nM   | 0.002 nM        | 40         |
| Impedimetric immunosensor  | 0.01~100 nM  | 0.04 nM         | 41         |
| PEC aptasensor             | 0.01~100 pM  | 0.005 pM        | This work  |

**Table S3** Analysis of real water samples with different concentrations of MC-LR ( $n = 3$ ).

| Tap Water |           |            |       | River water |            |       |
|-----------|-----------|------------|-------|-------------|------------|-------|
| Added/pM  | Found/pM  | Recovery/% | RSD/% | Found/pM    | Recovery/% | RSD/% |
| 0.2       | 0.19±0.02 | 95.0       | 5.7   | 0.22±0.02   | 110        | 5.3   |
| 2         | 1.93±0.17 | 96.5       | 5.4   | 2.13±0.11   | 106.5      | 6.8   |
| 20        | 19.1±1.24 | 95.5       | 6.1   | 21.6±1.02   | 108        | 6.5   |

## References

- (23) Wang, W. J.; Hao, Q.; Wang, W.; Bao, L.; Lei, J. P.; Wang, Q. B.; Ju, H. X. Quantum Dot-functionalized Porous ZnO Nanosheets as a Visible Light Induced Photoelectrochemical Platform for DNA Detection. *Nanoscale* **2014**, 6, 2710–2717.
